# Supplementary material for: Does manager with E-leadership inspire employee creativity?—A Study on moderating role of promoting regulatory focus and preventing regulatory focus.
Source: Research Square preprint supplement (doi:10.21203/rs.3.rs-5350073/v1), 2024-11-29
Supplement: Supplementary file 1 [file 61bd2f0dd2b374cb2fda78f2.xlsx]

## Sheet: 数据
序号	A1	A2	A3	A4	A5	A6	A7	A8	A9	A10	A11	A12	A13	A14	A15	b1	b2	b3	b4	b5	b6	C1	C2	C3	C4	C5	C6	C7	C8	D1	D2	D3	D4	D5	D6	D7	D8	D9	D10	D11	D12	D13	D14	D15	D16	D17	D18	E1	E2
1	6	5	4	5	4	6	5	4	6	6	6	5	6	4	6	3	1	1	3	1	3	4	4	6	6	5	6	5	5	5	5	4	5	6	5	4	4	2	3	2	3	3	2	2	3	2	1	4	6
2	1	3	2	1	3	3	3	1	1	3	3	3	3	1	3	6	6	4	4	6	4	5	4	6	5	4	6	6	4	4	5	4	5	5	5	5	6	5	6	4	5	5	4	4	5	4	5	4	5
3	4	4	6	4	5	4	6	6	6	4	4	5	6	6	6	6	5	4	5	6	5	4	4	6	4	5	4	6	5	5	5	4	5	6	6	6	6	2	3	1	2	3	3	3	2	1	3	4	6
4	5	4	4	4	5	5	4	4	4	5	4	6	4	5	4	4	4	4	5	5	4	6	5	4	6	5	4	4	5	3	3	1	3	2	3	1	3	2	3	1	2	3	1	2	3	1	2	6	5
5	1	1	2	2	1	1	1	1	2	1	1	1	3	1	2	6	6	5	5	6	6	4	6	6	5	4	4	6	4	1	2	3	3	2	2	1	2	1	1	1	3	3	2	1	1	1	3	5	5
6	4	6	4	5	4	6	5	4	4	5	6	5	4	5	5	5	5	4	5	6	5	4	6	6	4	5	6	5	4	6	6	4	6	5	6	4	6	1	1	3	2	1	3	1	2	3	1	5	4
7	1	3	2	1	3	3	3	1	1	3	3	3	3	1	3	4	6	5	4	4	4	4	4	4	6	4	6	6	4	5	5	6	4	5	4	6	5	2	1	3	1	2	3	1	2	2	2	6	5
8	6	4	5	4	6	5	4	4	4	5	5	4	5	4	4	4	6	6	6	6	4	6	5	4	6	5	4	6	5	4	6	5	4	4	4	4	5	6	6	5	6	5	5	4	6	5	6	5	5
9	6	6	6	5	4	6	5	4	6	5	5	6	4	5	6	1	2	3	2	1	3	5	5	5	6	5	5	5	4	3	2	3	2	1	3	1	2	3	3	3	2	1	2	3	1	2	3	4	4
10	2	2	1	2	3	2	1	3	2	1	1	2	2	1	2	3	1	1	3	1	3	4	4	5	4	6	5	5	5	5	6	6	4	5	5	6	5	2	3	1	2	3	3	3	3	2	1	2	1
11	4	6	6	6	4	4	6	4	4	4	5	4	6	5	4	6	6	6	4	6	6	4	5	6	5	4	6	5	5	6	6	5	4	5	4	6	5	4	6	4	4	4	6	5	4	5	6	4	5
12	5	6	6	5	6	5	5	6	6	4	5	6	4	6	5	6	5	4	4	4	5	6	4	6	4	5	4	6	5	6	4	4	6	4	6	6	4	4	6	4	4	4	6	5	4	5	6	6	4
13	6	5	4	4	4	5	4	6	4	4	4	5	4	6	5	5	6	4	6	5	4	1	1	2	3	1	3	2	1	5	4	6	5	5	6	6	6	2	2	3	2	1	2	3	1	2	2	5	4
14	5	4	4	5	4	4	5	6	4	5	4	6	5	4	6	1	1	2	2	1	2	4	6	4	6	6	4	6	5	5	5	4	5	4	4	5	5	3	3	2	2	2	2	2	2	1	2	5	4
15	6	6	5	6	4	6	5	4	6	5	5	5	4	5	6	5	4	6	6	4	5	1	2	3	3	2	1	2	1	4	4	4	5	4	6	4	5	1	2	2	1	2	3	1	2	3	1	5	6
16	1	3	1	2	1	3	2	1	2	2	3	3	2	2	2	2	3	2	3	2	2	6	6	6	4	4	6	6	6	5	6	5	4	6	6	6	6	2	3	1	1	1	3	3	1	3	1	6	5
17	4	4	5	5	6	4	4	5	4	6	4	5	4	6	5	6	6	6	4	4	5	6	5	4	4	5	6	4	5	6	5	5	5	4	4	6	4	1	3	2	1	2	3	3	3	2	2	5	6
18	4	6	5	4	6	5	4	4	4	5	5	4	5	4	4	5	4	4	5	4	5	5	5	4	5	6	5	4	6	5	4	5	6	5	4	4	4	2	2	3	2	1	2	3	1	2	2	6	5
19	4	4	4	5	5	5	6	5	5	6	5	4	5	5	6	1	3	1	2	1	3	5	6	4	6	5	4	6	5	6	5	6	6	4	5	6	5	2	1	2	3	1	2	3	1	2	3	6	5
20	6	5	6	5	4	6	5	5	5	6	6	5	5	5	5	6	6	6	4	4	5	5	6	4	6	5	4	6	5	4	4	4	5	4	6	4	5	6	4	6	5	6	4	5	6	4	4	5	5
21	6	4	4	5	6	4	6	5	4	6	5	4	4	4	5	5	4	6	5	4	6	4	6	5	4	6	6	6	5	5	5	4	5	4	4	5	5	2	1	2	3	1	2	3	3	3	2	5	5
22	6	5	6	6	4	5	5	4	5	4	4	5	4	6	4	6	5	6	6	6	6	5	6	6	5	6	5	5	6	1	3	2	3	1	3	2	1	2	3	2	3	3	2	2	3	2	1	4	6
23	4	6	5	5	5	6	6	5	6	5	5	6	5	5	5	5	6	4	6	6	6	3	2	1	3	2	1	1	1	4	4	4	5	5	4	4	4	3	1	2	3	1	1	1	2	1	3	5	4
24	5	6	4	6	4	6	5	4	6	5	5	5	5	5	4	5	4	6	4	5	5	6	5	4	6	5	4	6	5	5	4	6	4	5	6	6	4	3	2	2	1	3	3	3	1	1	2	4	6
25	4	6	4	5	4	6	5	4	4	5	6	5	4	5	5	4	4	4	4	5	5	4	6	5	4	6	6	6	4	6	5	5	5	4	4	6	4	4	5	5	6	4	5	6	5	5	4	2	3
26	4	5	6	4	6	5	5	5	6	6	5	6	5	6	6	4	6	6	6	6	4	5	5	6	4	5	6	5	4	5	5	4	5	6	5	4	6	4	5	6	4	4	4	6	6	4	6	6	5
27	5	5	6	4	4	4	6	6	5	6	4	6	5	4	5	1	2	1	3	2	1	1	3	3	1	3	1	2	1	6	6	4	4	6	6	6	6	2	1	3	1	2	3	1	1	1	3	4	6
28	6	4	5	6	4	6	5	4	4	6	6	6	4	4	6	4	4	4	4	5	5	2	1	3	2	1	1	2	2	3	2	3	2	1	3	1	2	1	2	3	1	2	3	3	3	2	2	5	4
29	4	4	5	6	4	4	6	5	4	6	6	6	4	4	6	1	2	1	3	2	1	5	6	4	6	5	4	6	5	5	5	5	6	6	4	5	5	4	5	5	6	4	5	6	5	5	4	5	4
30	5	4	6	5	4	6	5	4	4	5	6	4	5	5	4	6	5	4	5	6	5	6	4	5	4	6	5	4	6	4	5	4	6	5	6	6	4	4	4	4	6	6	6	5	4	6	4	4	6
31	2	3	1	2	1	3	2	3	3	1	2	3	2	1	3	5	4	5	6	5	4	5	4	6	5	4	6	5	4	5	6	4	5	6	6	5	4	1	3	2	3	1	2	1	2	2	2	2	3
32	4	6	4	5	4	6	5	4	4	5	6	5	4	5	5	4	4	4	4	5	5	5	5	5	6	5	5	5	4	4	6	5	4	4	5	6	4	1	1	3	1	3	3	2	1	3	1	6	5
33	5	6	5	5	6	5	6	6	4	5	6	5	4	6	5	5	5	4	4	6	4	4	6	5	4	6	6	4	4	5	5	6	4	5	4	6	5	2	1	3	1	2	3	1	2	3	1	4	5
34	3	2	2	3	2	2	3	1	2	3	2	1	3	2	1	4	6	4	5	4	6	4	6	4	4	5	6	4	6	5	6	6	5	6	6	6	4	3	3	2	1	3	1	2	3	1	2	3	2
35	5	4	4	5	6	6	4	5	6	5	4	6	5	6	6	6	4	5	4	6	5	5	5	4	5	6	5	4	6	4	4	4	5	5	5	4	5	2	2	1	1	2	1	2	2	1	2	3	3
36	4	5	6	4	6	5	5	5	6	6	5	6	5	6	6	6	5	4	4	4	6	1	1	3	2	2	2	2	3	2	1	3	3	3	1	3	2	4	5	6	4	4	4	5	4	6	4	6	6
37	1	3	2	2	2	2	2	2	1	2	2	1	2	1	2	4	4	6	4	6	4	5	4	6	5	4	6	5	4	3	2	3	2	1	3	1	2	2	3	1	1	1	3	3	1	3	1	4	5
38	3	1	2	1	3	2	1	3	3	1	2	3	1	3	2	5	4	6	6	5	6	4	4	6	6	5	6	5	5	5	5	4	5	4	4	5	5	2	3	1	1	1	3	3	1	3	1	5	4
39	4	4	6	6	4	5	4	6	5	4	6	6	4	5	6	5	4	6	5	4	6	4	5	6	5	4	6	5	4	4	4	6	4	5	4	6	5	2	3	1	1	1	3	3	1	3	1	5	4
40	1	3	2	1	3	3	2	3	3	2	3	2	2	3	1	5	4	5	6	5	4	1	2	3	3	2	1	2	1	4	6	5	4	4	4	4	5	5	6	4	5	5	5	4	4	5	5	6	5
41	6	5	6	6	4	5	5	4	5	4	4	5	4	6	4	6	6	4	5	6	5	4	4	4	5	4	6	5	4	5	6	6	5	6	5	5	6	2	3	2	3	3	2	2	3	2	1	5	5
42	5	4	6	5	5	5	6	6	4	5	5	6	4	6	5	3	2	1	3	3	3	5	5	6	4	5	6	5	4	6	5	4	6	4	6	4	4	1	1	3	3	2	1	1	1	3	3	2	1
43	6	5	4	6	6	6	4	4	4	4	4	4	5	4	6	1	1	2	2	1	2	6	6	6	4	4	6	6	6	2	3	2	1	2	3	2	1	3	1	2	3	1	1	1	2	1	3	4	6
44	4	5	5	4	6	6	6	6	4	4	4	4	5	5	6	2	1	3	2	2	1	6	4	6	6	5	4	6	5	5	6	5	5	6	5	4	6	2	2	1	2	2	2	2	1	3	2	5	6
45	6	6	4	5	6	5	4	6	5	4	4	4	5	5	4	6	6	4	5	4	5	5	4	6	5	4	6	5	4	2	1	3	3	3	1	3	2	2	3	2	3	3	2	2	3	2	1	4	6
46	6	4	5	4	6	5	5	5	6	6	5	5	5	5	4	5	4	6	6	6	4	6	4	6	4	5	4	6	5	2	3	2	1	2	3	2	1	5	6	4	5	5	5	5	6	5	4	5	4
47	4	5	6	5	4	6	5	4	4	4	6	4	5	4	4	4	5	6	4	6	5	5	5	6	5	4	5	5	5	4	6	4	5	4	6	6	6	6	4	5	6	4	4	4	6	6	4	4	6
48	2	3	1	2	1	3	2	3	3	1	2	3	2	1	3	6	6	5	6	4	6	5	5	6	6	5	5	5	5	5	4	6	5	5	5	5	5	6	4	6	5	6	4	5	6	4	4	5	4
49	4	6	5	4	6	5	6	6	4	5	6	5	4	6	5	4	6	5	6	4	4	5	6	4	6	5	4	6	5	6	4	5	6	4	6	5	4	1	3	2	3	1	2	1	2	2	2	5	6
50	5	4	6	5	4	6	5	4	4	5	6	4	5	5	4	5	4	6	5	4	6	4	4	4	4	5	6	5	4	2	4	2	2	4	3	3	1	5	6	4	5	5	4	4	5	4	5	5	6
51	5	5	6	4	4	4	6	6	5	6	4	6	5	4	5	5	4	5	6	5	4	5	6	4	6	5	4	6	5	2	3	1	2	1	3	2	2	3	1	2	3	1	1	1	2	1	3	2	1
52	4	5	6	4	6	5	6	6	4	5	6	5	4	6	6	3	1	2	1	3	2	4	4	6	6	5	6	5	5	2	2	3	1	3	2	3	3	2	1	3	3	3	2	3	1	2	3	6	5
53	5	4	4	5	6	6	4	5	6	5	4	6	5	6	6	5	5	5	4	5	6	5	5	6	5	4	5	5	5	6	6	4	4	6	6	6	6	4	5	5	6	4	5	6	5	5	4	1	3
54	1	2	3	1	3	2	2	1	3	2	2	2	3	3	2	5	5	5	4	5	6	4	4	6	4	5	4	6	5	2	1	2	3	3	1	4	2	2	3	3	2	3	1	3	3	2	1	5	4
55	6	6	5	5	5	5	4	4	6	4	5	4	6	5	4	2	3	2	1	3	3	6	6	4	5	6	5	4	6	4	6	5	4	4	4	4	5	1	2	3	1	2	3	3	2	1	3	6	5
56	5	4	4	5	6	6	4	5	6	5	4	6	5	6	6	5	6	4	6	5	5	5	6	6	5	6	5	5	6	6	4	5	6	4	6	5	4	3	3	3	2	1	2	3	1	2	3	2	2
57	1	3	1	2	1	3	2	1	2	2	3	3	2	2	2	6	5	4	5	6	5	2	2	1	1	1	1	2	1	4	6	5	5	5	6	6	5	1	2	1	1	1	1	2	1	1	3	5	6
58	5	4	5	6	5	4	6	5	4	4	4	6	4	5	4	6	4	6	5	4	4	6	5	4	6	5	4	4	4	6	6	6	5	6	5	6	6	3	3	2	3	3	2	1	3	2	3	5	5
59	4	6	5	5	5	6	6	5	6	5	5	6	5	5	5	5	4	5	4	4	4	5	4	6	5	4	6	5	5	2	3	2	1	2	3	2	1	4	5	6	4	4	4	5	4	6	4	6	5
60	2	3	1	2	1	3	2	3	3	1	2	3	2	1	3	5	5	6	6	6	5	1	3	2	1	3	2	2	2	6	5	5	5	4	4	6	4	2	3	1	2	3	1	2	3	1	2	5	4
61	6	5	4	6	5	5	5	4	5	6	5	4	6	5	4	1	1	2	3	3	3	4	4	4	4	5	6	5	4	6	5	4	4	4	5	5	4	4	5	5	6	4	5	6	5	5	4	6	5
62	6	5	4	6	5	5	5	4	5	6	5	4	6	5	4	2	3	2	1	3	3	6	5	4	6	5	4	4	4	4	4	5	5	4	5	4	4	2	3	3	2	3	1	3	3	2	1	5	6
63	6	4	5	4	4	4	6	5	6	6	4	5	6	5	4	4	6	6	6	6	4	6	5	4	5	5	6	4	5	4	5	4	4	6	5	5	4	3	1	2	3	1	1	1	3	3	1	5	4
64	1	2	3	1	3	2	2	1	3	2	2	2	3	3	2	1	3	1	2	1	3	4	4	5	4	4	5	6	5	2	1	3	1	3	3	1	3	4	5	5	5	6	5	4	4	5	6	5	6
65	1	1	2	2	1	1	1	1	2	1	1	1	3	1	2	5	4	6	4	5	5	5	5	6	5	4	5	5	5	6	4	5	4	6	6	6	4	5	4	4	5	5	5	5	4	5	5	4	6
66	5	4	6	6	6	4	4	6	4	6	6	5	6	4	5	5	6	4	6	5	5	6	5	4	6	5	4	6	5	2	1	2	3	2	2	1	1	3	1	3	1	2	3	1	3	2	2	1	3
67	5	5	6	4	4	4	6	6	5	6	4	6	5	4	5	5	5	6	6	6	5	4	6	5	4	6	5	5	5	1	2	1	3	1	2	1	3	1	2	3	3	3	2	2	3	1	2	6	5
68	4	4	6	4	5	4	6	5	4	4	4	5	5	6	4	1	3	2	1	1	1	3	2	1	3	2	1	1	1	6	6	6	4	4	6	6	6	3	1	2	3	1	1	1	2	1	3	4	6
69	4	4	6	4	5	4	6	6	6	4	4	5	6	6	6	6	6	4	5	6	5	5	5	4	5	5	5	5	4	2	1	1	1	2	2	1	2	1	3	2	1	2	3	1	2	3	3	5	6
70	4	6	5	4	6	5	4	4	4	5	5	4	5	4	4	4	4	4	4	5	5	6	6	4	6	5	4	6	5	4	6	5	5	5	6	6	5	2	3	2	3	2	2	1	3	2	3	4	5
71	6	5	6	6	4	5	5	4	5	4	4	5	4	6	4	5	6	4	6	5	5	4	4	4	6	4	6	6	4	4	6	5	4	4	4	6	4	1	1	1	3	3	2	1	1	1	3	5	4
72	4	6	5	5	4	5	6	6	4	5	6	5	4	6	5	1	1	2	3	3	3	5	5	6	4	6	4	6	6	6	6	4	6	5	6	4	6	2	3	3	2	1	3	2	3	1	2	6	5
73	6	4	5	6	4	6	5	4	4	6	6	6	4	4	6	4	5	4	6	5	4	5	5	6	6	5	5	5	5	5	6	5	5	4	4	6	5	4	5	6	5	5	4	6	5	6	4	5	4
74	1	1	2	1	2	2	3	1	2	1	3	2	1	3	1	5	6	4	6	5	5	5	5	4	5	5	5	5	4	5	4	5	6	5	4	4	4	3	3	2	3	3	2	1	3	2	3	4	6
75	4	5	4	6	4	4	5	6	4	6	5	4	6	5	5	3	2	1	3	3	3	4	4	5	4	6	5	5	5	4	4	5	5	4	5	4	4	2	2	3	2	1	2	3	1	2	2	6	5
76	1	3	2	2	2	2	2	2	1	2	2	1	2	1	2	1	1	2	3	3	3	4	6	4	5	4	6	5	4	4	4	4	5	4	6	4	5	2	3	1	2	3	3	3	2	1	3	6	4
77	6	4	5	4	6	5	5	5	6	6	5	5	5	5	4	1	1	2	1	2	2	5	4	6	5	4	6	5	4	1	3	3	1	1	3	1	3	1	2	3	1	2	3	3	3	2	2	4	4
78	4	6	4	4	5	5	4	4	4	4	5	4	6	5	5	6	6	6	4	6	6	5	4	4	4	5	5	4	4	6	6	5	4	5	4	6	5	2	2	2	3	3	2	1	1	1	2	4	6
79	4	4	6	6	4	5	4	6	5	4	6	6	4	5	6	5	5	4	5	4	4	5	4	5	4	4	5	4	6	4	4	6	4	5	4	6	5	5	6	4	5	5	5	4	4	5	5	6	4
80	1	3	2	1	3	3	3	1	1	3	3	3	3	1	3	3	1	3	2	3	3	4	5	6	5	4	6	5	4	2	1	3	1	3	3	1	3	1	3	1	2	2	2	3	2	1	2	5	4
81	6	5	4	5	4	6	5	4	6	6	6	5	6	4	6	2	3	2	1	3	3	6	4	5	4	6	5	4	6	5	4	4	4	6	5	5	5	6	4	5	6	6	6	5	5	4	6	4	4
82	5	4	4	5	6	6	4	5	6	5	4	6	5	6	6	6	5	5	4	5	4	5	4	6	5	4	6	6	4	2	1	2	3	2	2	1	1	2	1	2	3	1	2	3	1	2	3	6	5
83	1	2	1	3	1	1	1	2	1	1	1	2	3	1	3	4	4	6	4	6	4	2	1	1	1	1	3	1	2	4	6	6	5	5	5	5	5	4	6	4	4	4	6	5	4	5	6	5	6
84	1	3	1	2	1	3	2	1	2	2	3	3	2	2	2	6	5	4	5	6	5	6	5	4	5	5	6	4	5	2	1	3	3	3	1	3	2	5	4	4	5	5	5	5	4	5	5	4	6
85	6	6	4	5	6	5	4	6	5	4	4	4	5	5	4	3	1	1	3	1	3	4	5	6	5	4	6	6	6	6	6	5	4	5	4	6	5	3	3	2	2	2	2	2	2	1	2	2	2
86	1	3	1	2	1	3	2	1	2	2	3	3	2	2	2	4	6	5	4	4	4	3	3	3	1	1	3	1	3	4	4	5	5	4	5	4	4	1	2	3	1	2	3	1	2	2	1	6	4
87	5	4	6	5	5	5	6	6	4	5	5	6	4	6	5	4	6	5	5	5	6	6	5	4	4	4	5	5	6	6	4	6	5	4	4	4	5	3	3	1	3	2	1	2	3	1	1	1	2
88	4	6	5	5	4	5	6	6	4	5	6	5	4	6	5	5	5	4	5	6	5	4	5	6	4	6	5	4	6	6	6	4	4	6	6	6	6	6	4	5	6	4	4	4	6	6	4	1	2
89	6	4	5	4	6	6	6	5	6	4	6	5	4	4	4	6	5	6	4	6	5	2	2	3	1	3	3	1	3	5	5	4	4	4	4	6	6	2	2	1	2	2	2	2	1	3	2	5	4
90	5	4	5	4	4	4	4	5	6	4	6	5	4	5	5	5	6	5	4	6	4	6	5	4	6	5	4	4	5	5	5	4	5	6	6	6	6	2	3	1	2	3	3	3	2	2	3	6	4
91	6	4	5	4	6	5	5	5	6	6	5	5	5	5	4	1	1	2	1	2	2	6	5	4	6	5	4	6	5	2	3	2	1	2	3	2	1	4	4	4	6	6	6	5	4	6	4	5	6
92	4	4	5	5	6	4	4	5	4	6	4	5	4	6	5	6	5	4	6	6	4	4	4	5	4	6	5	5	5	5	5	6	6	5	6	5	5	2	1	3	1	2	3	1	2	3	1	6	4
93	5	5	5	6	4	6	5	4	4	4	5	4	6	4	4	4	5	4	6	4	5	5	5	4	5	4	4	5	4	5	4	6	5	6	5	6	5	1	2	3	1	2	3	3	3	1	1	4	6
94	6	6	4	5	6	5	4	6	5	4	4	4	5	5	4	6	5	4	6	6	6	6	6	4	5	6	5	4	6	5	4	6	5	4	6	5	4	1	2	3	2	2	1	3	2	3	1	3	3
95	4	5	5	4	6	6	6	6	4	4	4	4	5	5	6	6	6	4	4	6	4	3	3	3	2	3	1	3	2	6	6	6	6	6	6	6	6	1	1	1	3	3	2	1	1	1	3	4	5
96	3	2	1	2	3	2	1	3	2	1	1	1	3	1	2	5	4	6	6	4	5	6	5	4	6	5	4	6	5	2	1	3	1	3	3	1	3	2	1	3	1	2	3	1	2	2	2	5	4
97	6	5	6	5	4	6	5	5	5	6	6	5	5	5	5	4	6	5	5	5	6	1	3	3	3	2	3	1	3	4	6	6	5	5	4	5	6	2	1	3	2	1	2	3	1	2	2	6	5
98	6	4	4	4	5	5	4	5	4	4	5	4	6	5	6	5	5	5	4	5	6	4	4	5	6	4	5	4	6	4	5	6	5	4	6	4	4	2	2	2	1	1	2	2	2	2	3	1	2
99	4	6	6	6	4	4	6	6	6	6	4	6	5	5	5	4	6	6	4	5	6	4	4	5	6	4	5	4	6	5	4	4	4	5	5	4	5	3	2	2	1	3	3	3	1	1	2	5	6
100	6	5	4	5	4	6	5	4	6	6	6	5	6	4	6	4	4	4	5	5	4	4	6	5	4	6	6	4	4	1	3	2	3	1	3	2	1	1	2	3	1	2	3	3	2	1	3	5	4
101	4	5	6	4	6	5	6	6	4	5	6	5	4	6	6	4	4	5	4	6	4	5	4	4	4	5	5	4	4	1	1	2	3	1	2	1	1	1	3	2	1	2	3	1	2	3	3	5	5
102	6	5	6	5	4	6	5	5	5	6	6	5	5	5	5	3	2	1	3	2	2	2	1	3	2	1	1	2	2	6	5	5	5	6	5	4	5	4	5	6	4	4	4	5	4	6	4	4	5
103	6	4	5	6	5	4	6	5	4	4	5	6	4	5	4	3	1	1	3	1	3	4	6	5	4	6	6	6	5	5	4	6	5	4	6	5	4	1	2	2	2	3	2	1	2	3	1	5	4
104	4	5	6	5	4	6	5	4	4	4	6	4	5	4	4	3	2	1	3	3	3	5	5	6	4	5	4	6	5	4	6	4	5	4	6	5	4	2	1	3	1	2	3	1	2	2	2	6	5
105	6	4	5	4	6	5	4	4	4	5	5	4	5	4	4	2	2	1	2	2	1	6	5	4	6	5	4	6	5	6	4	6	5	4	4	4	5	5	6	4	5	5	5	4	4	5	5	2	3
106	5	4	4	5	4	4	5	6	4	5	4	6	5	4	6	6	5	4	6	6	6	5	5	6	5	4	5	5	5	4	6	4	5	4	6	5	4	2	1	2	3	1	2	2	2	1	1	6	4
107	6	4	4	6	4	6	6	4	4	5	6	4	5	4	6	4	5	6	4	6	5	5	4	6	6	4	5	6	4	5	5	6	4	5	4	6	5	1	2	3	1	2	3	1	2	3	1	3	2
108	4	4	6	6	4	5	4	6	5	4	6	6	4	5	6	4	6	4	5	4	6	5	5	6	4	5	4	6	5	5	4	5	6	6	5	4	6	4	5	6	5	5	4	6	5	6	4	1	2
109	6	6	5	6	5	5	6	5	4	4	5	6	4	5	4	1	2	3	2	1	3	3	3	3	1	1	3	1	3	5	6	5	5	4	4	6	5	2	1	2	3	1	2	3	1	2	3	5	4
110	4	5	6	4	6	5	5	5	6	6	5	6	5	6	6	4	6	4	5	4	6	4	6	5	4	6	6	6	4	4	6	6	5	5	4	5	6	2	3	3	1	2	2	2	1	1	2	4	6
111	1	3	1	2	1	3	2	1	2	2	3	3	2	2	2	5	4	4	6	6	6	6	4	6	6	5	4	6	5	5	5	6	6	5	6	5	5	2	3	1	1	1	3	3	1	3	1	3	3
112	1	3	2	2	2	2	2	2	1	2	2	1	2	1	2	5	6	4	6	5	4	4	6	4	6	6	4	6	5	5	4	4	4	5	5	4	5	3	1	3	1	2	3	1	3	2	2	4	6
113	5	4	4	4	5	4	6	4	4	4	5	4	6	5	5	5	4	6	6	5	6	4	6	5	5	5	6	6	5	6	6	4	6	5	6	4	6	2	3	1	2	3	1	2	3	1	2	4	5
114	4	5	5	6	4	5	4	4	6	5	4	6	5	5	5	6	5	4	4	4	5	4	6	6	5	4	4	6	4	5	4	5	4	4	5	5	6	2	2	1	1	2	1	2	2	1	2	5	5
115	4	5	6	4	6	5	6	6	4	5	6	5	4	6	6	6	6	5	6	4	6	4	4	5	4	6	5	5	5	6	4	6	5	4	4	4	5	1	3	1	2	1	1	1	3	1	3	4	6
116	6	6	4	5	6	5	4	6	5	4	4	4	5	5	4	5	6	4	6	5	5	6	6	6	4	4	6	6	6	4	5	6	5	5	5	5	4	4	4	4	6	6	6	5	4	6	4	6	5
117	4	6	4	5	4	6	5	4	4	5	6	5	4	5	5	5	4	6	6	4	5	4	6	4	4	5	6	4	6	4	6	5	4	6	5	5	4	1	2	1	1	1	1	2	1	1	3	5	6
118	1	3	3	2	2	2	1	2	3	2	1	3	2	1	1	6	4	6	5	4	4	4	4	4	4	5	6	5	4	5	6	4	5	4	6	5	5	6	6	5	6	5	5	4	6	5	6	5	5
119	5	4	4	4	5	4	6	4	4	4	5	4	6	5	5	6	6	6	4	6	6	2	2	1	1	1	1	2	1	3	2	3	2	1	3	1	2	2	1	3	3	3	2	3	1	2	3	3	3
120	1	3	2	1	3	3	3	1	1	3	3	3	3	1	3	4	6	4	4	4	5	5	4	6	6	4	5	6	4	4	6	5	5	5	6	5	4	4	4	4	6	6	6	5	4	6	4	2	3
121	6	5	4	5	4	6	5	4	6	6	6	5	6	4	6	5	4	6	6	5	6	4	4	4	5	4	6	4	4	5	5	5	5	5	5	5	5	1	1	1	3	3	2	1	1	1	3	5	4
122	6	4	4	5	6	4	6	5	4	6	5	4	4	4	5	4	6	5	6	4	4	4	4	6	4	5	4	6	5	5	6	6	4	5	5	6	5	2	2	2	1	1	2	2	2	2	3	2	1
123	4	4	6	4	5	4	6	5	4	4	4	5	5	6	4	6	5	5	5	5	6	4	6	4	4	5	6	4	6	6	4	5	6	4	6	5	4	1	1	3	3	2	1	1	1	3	3	4	6
124	4	5	6	4	6	5	6	6	4	5	6	5	4	6	6	3	1	2	1	3	2	1	1	3	2	2	2	2	3	1	3	2	3	1	3	2	1	2	3	1	2	3	3	3	2	2	1	2	2
125	5	6	6	5	6	5	5	6	6	4	5	6	4	6	5	4	6	4	4	4	5	4	6	5	5	5	6	6	5	5	5	6	6	5	6	5	5	4	5	6	4	4	4	5	4	6	4	5	5
126	1	3	2	1	3	3	3	1	1	3	3	3	3	1	3	2	3	1	3	2	1	4	4	6	6	5	6	5	5	6	4	6	4	4	5	6	4	3	1	3	1	1	3	1	3	3	2	6	5
127	1	1	2	2	2	2	1	2	3	1	3	3	3	2	3	4	6	6	6	5	6	4	4	5	4	6	5	5	5	2	2	3	3	2	2	2	2	4	6	6	5	4	6	5	6	4	5	5	4
128	3	3	1	1	3	1	3	3	1	3	2	2	3	1	3	5	4	6	6	6	4	4	4	4	5	4	6	5	4	5	5	4	5	6	5	4	6	1	1	3	1	3	3	2	1	3	1	5	5
129	4	4	5	5	6	4	4	5	4	6	4	5	4	6	5	5	5	4	5	6	5	4	5	6	5	6	5	4	6	6	6	6	4	4	6	6	6	2	3	1	2	3	3	3	2	2	3	4	5
130	5	6	4	6	4	6	5	4	6	5	5	5	5	5	4	5	4	4	5	4	5	5	4	6	5	4	6	5	4	5	5	4	5	6	5	4	4	1	2	3	1	2	3	1	2	3	1	5	6
131	5	4	4	4	5	5	4	4	4	5	4	6	4	5	4	4	6	6	6	5	6	1	1	3	2	2	2	2	3	5	6	6	4	5	6	5	4	3	2	2	1	3	3	3	1	1	2	6	4
132	6	5	4	4	4	5	5	4	4	4	4	5	4	6	6	3	1	3	2	3	3	4	4	6	4	5	4	6	5	4	6	4	5	4	6	5	4	2	2	3	2	1	2	3	1	2	2	4	6
133	6	6	5	5	5	5	4	4	6	4	5	4	6	5	4	5	4	4	6	6	6	4	6	4	6	6	4	6	5	6	4	6	4	4	5	6	4	1	3	2	1	2	3	1	2	3	3	4	6
134	4	5	6	5	4	6	5	4	4	4	6	4	5	4	4	4	4	5	4	6	4	4	4	5	4	4	5	6	5	6	4	4	5	6	5	5	5	2	2	1	3	3	2	1	2	2	2	5	4
135	3	2	2	3	2	2	3	1	2	3	2	1	3	2	1	4	6	5	4	4	4	6	5	4	5	5	6	4	5	4	5	4	6	5	4	4	4	1	1	3	2	1	3	1	2	3	1	3	3
136	4	6	5	5	4	5	6	6	4	5	6	5	4	6	5	4	6	6	6	6	4	2	1	3	2	1	1	2	2	6	4	6	4	6	6	5	5	2	1	3	3	3	2	3	1	2	3	5	5
137	4	6	6	6	4	4	6	6	6	6	4	6	5	5	5	4	6	6	4	4	6	4	6	6	4	5	6	5	4	5	4	5	6	5	4	4	4	3	2	3	1	1	1	1	3	2	3	1	2
138	6	4	5	6	5	4	6	5	4	4	5	6	4	5	4	6	5	4	4	4	6	4	6	6	5	4	4	6	4	6	4	6	5	4	4	4	5	2	3	2	3	3	2	3	2	2	1	6	6
139	5	4	4	4	6	4	5	4	6	5	4	4	4	6	4	2	1	2	3	2	1	5	6	4	6	5	4	6	5	4	4	4	5	5	4	4	4	2	1	3	3	3	2	3	1	2	3	6	5
140	6	5	4	4	4	5	4	6	4	4	4	5	4	6	5	4	6	5	4	4	4	5	4	6	5	4	6	5	4	5	5	4	5	5	5	5	6	1	3	2	3	1	2	1	2	2	2	5	5
141	4	4	5	5	4	5	4	6	6	4	5	6	5	5	5	5	6	4	5	4	6	5	4	6	5	4	6	5	4	3	3	3	1	1	3	1	3	1	2	1	2	2	1	2	3	2	2	3	2
142	6	6	6	5	4	6	5	4	6	5	5	6	4	5	6	4	4	6	4	5	6	5	4	4	4	5	5	4	4	4	5	4	6	5	5	6	4	1	2	3	3	3	2	2	3	1	2	5	6
143	5	5	5	6	4	6	5	4	4	4	5	4	6	4	4	5	6	4	6	6	6	4	6	6	5	4	4	6	4	5	6	5	4	6	6	6	6	3	1	2	3	1	1	1	3	3	1	4	4
144	6	5	4	4	4	5	5	4	4	4	4	5	4	6	6	6	6	5	5	6	6	4	5	4	6	5	4	4	4	4	5	6	5	4	6	4	4	4	5	6	4	4	4	6	6	4	6	5	5
145	3	3	2	3	1	3	2	1	3	2	2	2	1	2	3	5	6	4	6	5	5	1	3	2	1	3	2	2	2	4	4	6	4	5	4	6	5	3	3	2	1	3	1	2	3	1	2	2	3
146	6	6	5	6	5	5	6	5	4	4	5	6	4	5	4	2	1	3	2	2	1	5	4	6	5	4	6	5	4	6	6	4	5	6	6	5	6	1	1	2	1	2	2	1	2	1	1	3	2
147	4	4	5	5	4	5	4	6	6	4	5	6	5	5	5	1	3	2	1	1	1	4	6	6	4	5	6	5	4	6	5	6	5	6	6	5	4	2	1	2	3	1	1	1	2	1	3	5	4
148	6	5	4	6	6	5	6	6	5	6	5	5	6	6	5	6	5	4	6	6	4	5	4	6	5	4	6	6	4	4	6	5	4	4	4	6	6	2	1	2	2	1	1	3	2	1	3	4	5
149	6	4	4	5	6	4	6	5	4	6	5	4	4	4	5	4	4	6	4	6	4	4	6	5	4	6	5	5	5	6	5	6	5	5	5	6	4	3	1	3	1	1	3	1	3	3	2	6	5
150	4	5	5	6	4	5	4	4	6	5	4	6	5	5	5	5	4	6	6	5	6	3	3	3	1	1	3	1	3	6	6	5	5	6	5	5	6	1	2	3	1	2	3	3	3	2	2	5	5
151	1	1	2	2	2	2	1	2	3	1	3	3	3	2	3	6	4	5	4	6	5	4	4	4	5	4	6	5	4	6	4	6	5	4	4	4	5	2	1	3	1	2	3	1	2	2	2	6	6
152	6	6	5	6	4	6	5	4	6	5	5	5	4	5	6	6	4	4	4	6	5	6	6	4	6	5	4	6	5	1	1	3	1	2	1	3	2	1	2	3	1	2	3	3	3	2	2	5	6
153	6	4	5	4	6	6	6	5	6	4	6	5	4	4	4	4	5	4	6	4	5	4	6	5	4	6	6	4	4	6	5	4	4	5	6	4	5	2	3	1	1	1	3	3	1	3	1	6	5
154	6	5	4	6	5	5	5	4	5	6	5	4	6	5	4	6	5	4	6	6	6	4	6	4	4	5	6	4	6	3	4	3	1	3	2	3	2	2	1	1	2	2	2	2	1	2	2	4	4
155	6	4	4	5	6	4	6	5	4	6	5	4	4	4	5	6	5	6	6	6	6	5	4	6	5	4	6	5	4	5	6	5	5	4	4	6	5	3	2	3	1	1	1	1	3	2	3	5	5
156	6	5	6	5	4	6	5	5	5	6	6	5	5	5	5	6	4	5	4	6	5	3	3	1	2	2	2	3	2	5	6	6	5	4	4	4	5	2	2	1	3	3	2	1	2	2	2	4	6
157	6	4	4	6	4	6	6	4	4	5	6	4	5	4	6	5	5	4	5	6	5	4	6	4	6	6	4	6	5	6	5	5	5	4	4	6	4	3	1	2	3	1	1	1	2	1	3	5	4
158	2	2	1	2	3	2	1	3	2	1	1	2	2	1	2	4	5	4	6	5	4	5	6	5	4	6	5	4	6	5	4	5	4	4	5	5	6	2	2	1	1	2	2	2	2	1	1	5	4
159	1	1	2	1	2	2	3	1	2	1	3	2	1	3	1	5	6	5	4	5	5	6	6	6	5	6	4	6	5	1	1	2	3	1	2	1	1	2	2	2	3	3	2	1	1	1	2	6	4
160	4	5	5	4	6	6	6	6	4	4	4	4	5	5	6	2	3	2	1	3	3	4	6	6	4	5	6	5	4	3	1	1	2	3	1	3	2	3	1	2	3	1	1	1	3	3	1	5	5
161	1	3	2	1	3	3	3	1	1	3	3	3	3	1	3	5	4	6	4	5	5	6	4	6	4	5	4	6	5	2	1	1	1	2	2	1	2	3	3	2	3	3	2	1	3	2	3	6	5
162	4	4	5	5	6	4	4	5	4	6	4	5	4	6	5	5	5	4	5	4	4	6	5	4	6	5	4	6	5	5	4	4	4	5	5	4	5	5	5	5	4	4	5	4	5	5	6	5	6
163	4	5	4	6	4	4	5	6	4	6	5	4	6	5	5	5	5	4	4	6	4	6	5	4	6	5	4	6	5	4	6	6	4	6	6	6	4	4	6	6	5	4	6	5	6	4	5	6	5
164	5	4	4	4	6	4	5	4	6	5	4	4	4	6	4	6	4	5	4	6	5	5	5	4	5	6	5	4	6	6	5	5	6	4	4	6	4	1	2	1	1	1	1	2	1	1	3	4	5
165	4	5	6	6	6	4	4	6	4	6	6	4	6	6	4	5	6	4	6	5	5	6	5	4	6	6	5	4	4	6	5	4	6	5	4	6	6	3	3	1	3	2	1	2	3	1	1	4	6
166	6	5	5	5	6	6	5	5	5	6	5	4	5	6	5	4	6	5	4	4	4	4	6	5	4	6	5	5	5	3	3	1	3	2	3	1	3	4	6	4	6	6	5	4	6	4	5	4	6
167	1	1	2	1	2	2	3	1	2	1	3	2	1	3	1	3	2	1	3	3	3	6	5	4	6	5	4	6	5	4	6	5	6	5	6	5	4	1	2	3	1	2	3	3	3	2	2	5	4
168	1	3	2	1	3	3	2	3	3	2	3	2	2	3	1	6	5	4	5	6	5	3	1	3	2	1	2	2	3	4	6	4	5	4	6	5	4	1	3	2	1	3	3	2	1	3	2	2	2
169	4	4	6	4	5	4	6	5	4	4	4	5	5	6	4	5	5	6	6	5	5	4	6	6	5	4	4	6	4	5	5	6	4	5	4	6	5	1	2	3	1	2	3	3	3	2	2	2	1
170	4	6	6	6	4	4	6	4	4	4	5	4	6	5	4	1	1	2	3	3	3	4	5	6	5	4	6	5	4	6	5	4	4	4	5	5	4	2	3	2	3	3	2	2	3	2	1	3	2
171	1	2	1	3	1	1	1	2	1	1	1	2	3	1	3	2	3	2	1	3	3	2	3	2	1	3	2	2	2	2	1	3	2	4	4	3	1	1	3	2	3	1	2	1	2	2	2	5	6
172	6	6	5	6	4	6	5	4	6	5	5	5	4	5	6	6	5	6	4	6	5	4	4	5	6	4	5	4	6	5	5	6	4	5	4	6	5	3	3	2	2	2	2	2	2	1	2	3	3
173	5	5	5	6	4	6	5	4	4	4	5	4	6	4	4	4	6	5	6	4	4	6	4	5	4	6	5	4	6	5	4	6	5	4	6	5	4	2	3	1	2	3	3	3	2	1	3	6	5
174	2	3	1	2	1	3	2	3	3	1	2	3	2	1	3	6	4	5	4	6	5	1	1	2	3	1	3	2	1	3	1	1	2	3	1	3	2	1	2	1	2	2	1	2	3	2	2	4	5
175	4	4	4	5	4	4	4	6	4	5	4	6	5	5	5	5	6	4	6	5	4	6	5	4	4	5	6	4	5	4	6	5	4	4	4	4	5	2	3	1	2	3	3	3	2	2	1	5	6
176	4	6	5	4	6	5	6	6	4	5	6	5	4	6	5	4	6	5	5	5	6	4	6	4	4	5	6	4	6	5	4	6	5	4	5	5	6	2	3	1	2	3	3	3	3	2	1	4	4
177	5	4	4	4	6	4	5	4	6	5	4	4	4	6	4	4	4	4	5	5	4	4	4	5	6	4	5	4	6	6	4	6	4	4	5	6	4	3	1	2	3	1	1	1	3	3	1	3	1
178	5	6	6	6	5	5	6	5	4	6	5	4	6	5	4	3	1	3	2	3	3	5	4	6	6	4	5	6	4	4	4	4	5	5	5	4	5	1	3	2	3	1	2	1	2	2	2	6	5
179	4	6	4	4	5	5	4	4	4	4	5	4	6	5	5	6	6	4	5	6	5	5	5	4	5	6	5	4	6	2	2	3	1	3	2	3	3	3	1	2	3	1	1	1	2	1	3	5	4
180	6	5	4	6	6	6	4	4	4	4	4	4	5	4	6	2	3	1	3	2	1	4	5	6	4	6	5	4	6	1	3	3	1	1	3	1	3	1	2	3	1	2	3	3	2	1	3	4	6
181	1	3	2	1	3	3	3	1	1	3	3	3	3	1	3	5	4	6	4	5	5	4	6	5	4	6	6	4	4	6	5	5	5	6	5	4	5	5	6	4	5	5	5	5	6	5	4	5	4
182	1	3	2	2	2	2	2	2	1	2	2	1	2	1	2	5	6	4	6	5	5	4	4	4	6	4	6	6	4	5	6	6	6	5	6	6	5	5	4	4	5	5	5	5	4	5	5	6	5
183	5	4	4	5	6	6	4	5	6	5	4	6	5	6	6	2	3	1	3	2	1	3	3	2	3	2	2	3	2	5	4	5	6	5	4	4	4	1	3	1	2	2	2	3	2	1	2	6	4
184	4	4	6	6	4	5	4	6	5	4	6	6	4	5	6	2	3	2	3	2	2	5	4	6	5	4	6	6	4	4	6	5	4	4	4	6	4	3	1	3	1	2	3	1	3	2	2	5	4
185	6	4	4	5	6	4	6	5	4	6	5	4	4	4	5	1	2	1	3	2	1	5	4	6	5	4	6	5	4	4	6	5	4	4	4	4	5	1	2	3	2	2	1	3	2	3	1	5	5
186	4	4	6	4	5	4	6	6	6	4	4	5	6	6	6	4	6	5	4	6	5	1	1	2	3	1	3	2	1	3	2	3	2	2	3	2	2	2	1	3	1	2	3	1	1	1	3	1	3
187	4	6	5	5	5	6	6	5	6	5	5	6	5	5	5	2	3	2	3	2	2	4	6	5	4	6	6	6	5	5	4	6	5	4	6	5	4	2	3	1	2	3	3	3	2	1	3	5	5
188	4	6	5	4	6	5	4	4	4	5	5	4	5	4	4	2	3	1	3	2	1	5	5	6	4	6	4	6	6	2	1	3	3	3	1	3	2	2	3	3	2	3	1	3	3	2	1	5	4
189	5	4	4	4	5	4	6	4	4	4	5	4	6	5	5	5	6	5	4	6	4	6	4	6	4	5	4	6	5	3	2	3	3	1	3	4	1	2	1	3	3	3	2	3	1	2	3	4	5
190	4	6	5	5	5	4	5	6	5	4	6	5	4	4	4	4	5	6	4	6	5	4	6	5	4	6	5	5	5	2	1	1	1	2	2	1	2	1	1	1	3	3	2	1	1	1	3	2	3
191	5	4	4	5	4	4	5	6	4	5	4	6	5	4	6	2	1	2	3	2	1	5	6	4	6	5	4	6	5	3	2	3	2	1	4	2	2	4	5	6	5	5	4	6	5	6	4	2	3
192	6	4	5	4	4	4	6	5	6	6	4	5	6	5	4	3	1	1	3	1	3	5	4	5	6	5	4	6	5	4	5	6	5	4	6	6	6	6	6	5	6	5	5	4	6	5	6	6	5
193	5	4	6	5	5	5	6	6	4	5	5	6	4	6	5	5	4	6	6	4	5	4	5	6	5	4	6	6	6	5	5	6	4	5	6	6	4	3	3	2	2	2	2	2	2	1	2	3	3
194	5	4	6	5	4	6	5	4	4	5	6	4	5	5	4	1	1	2	3	3	3	5	5	6	6	5	5	5	5	5	5	6	4	5	4	6	5	1	2	3	3	3	2	2	3	1	2	6	5
195	4	6	5	5	5	4	5	6	5	4	6	5	4	4	4	2	1	2	3	2	1	4	6	6	6	4	4	6	4	2	3	1	2	3	2	1	3	1	1	1	3	3	2	1	1	1	3	4	6
196	1	3	1	2	1	3	2	1	2	2	3	3	2	2	2	5	5	4	5	6	5	6	6	4	4	6	5	5	6	2	2	3	1	3	2	3	3	2	1	2	3	1	2	2	2	1	1	4	6
197	6	4	4	6	4	6	6	4	4	5	6	4	5	4	6	5	5	4	5	6	5	5	4	6	5	5	6	4	5	6	6	4	4	6	6	6	6	6	4	6	5	6	4	5	6	4	4	5	4
198	4	4	5	5	6	4	4	5	4	6	4	5	4	6	5	6	5	4	4	4	5	6	6	4	5	6	5	4	6	5	4	6	5	4	5	5	6	1	2	2	1	2	3	1	2	3	1	2	3
199	5	5	4	5	6	5	5	5	5	5	6	6	6	5	6	5	5	5	5	4	5	4	4	5	6	5	5	5	6	4	6	4	5	4	6	5	4	6	4	4	2	2	2	1	2	3	3	5	5
200	6	6	6	6	6	6	6	6	6	6	6	6	6	6	6	6	6	6	6	6	6	6	6	6	6	6	6	6	6	6	5	4	5	5	6	6	4	1	1	1	1	1	1	1	1	1	1	6	6
201	5	5	5	5	5	4	4	4	4	4	4	5	5	5	4	5	5	5	5	5	6	5	5	5	4	5	5	5	5	2	3	1	1	2	2	3	3	2	2	2	2	2	2	2	3	2	2	5	5
202	6	4	5	4	5	4	5	6	5	4	5	4	5	5	6	6	6	5	6	4	5	6	6	5	5	5	6	6	4	5	4	6	5	5	5	5	5	2	2	2	2	3	2	2	2	3	1	4	4
203	4	1	4	2	3	2	1	4	2	2	1	2	1	1	3	1	4	1	3	2	4	3	2	1	3	2	3	3	2	6	4	5	4	6	6	6	4	3	6	4	6	6	5	4	5	5	4	1	1
204	6	6	5	4	6	5	5	5	5	4	4	5	5	5	4	5	4	6	5	4	5	6	6	4	6	6	4	6	5	5	6	6	4	5	5	5	4	2	3	2	2	2	1	2	2	2	3	6	5
205	6	6	6	6	5	6	6	6	6	4	5	6	5	6	6	6	6	6	5	5	6	5	6	5	5	6	4	6	5	6	5	4	4	5	6	4	5	2	2	1	2	2	2	1	1	1	2	6	5
206	5	4	6	5	6	4	5	5	6	4	4	5	6	5	4	6	6	5	5	6	6	6	6	5	6	5	6	6	4	1	2	1	3	1	2	1	3	1	1	2	2	3	1	2	3	1	1	5	5
207	3	1	3	1	2	3	1	1	3	3	1	3	1	3	1	3	3	1	2	3	3	2	1	2	1	4	3	3	2	2	1	2	3	2	2	1	1	5	5	5	3	5	6	5	6	4	3	2	2
208	4	2	3	3	3	3	3	2	4	1	1	1	3	2	2	2	1	1	3	2	1	2	1	2	1	3	2	2	2	4	6	4	5	4	6	5	4	5	4	6	6	5	6	4	5	6	6	2	2
209	6	6	6	5	4	6	5	6	5	6	4	5	6	5	6	5	6	5	6	4	5	6	5	4	6	6	6	6	4	4	5	4	6	5	4	4	4	1	3	3	2	1	2	1	3	2	2	6	5
210	6	6	6	4	4	6	5	5	6	4	6	5	5	6	6	5	4	5	5	6	5	5	4	4	6	6	6	6	6	4	4	6	4	5	4	6	5	1	2	2	2	3	2	2	3	2	1	6	5
211	1	1	4	3	2	3	2	2	3	1	2	1	1	2	1	3	2	2	3	3	3	1	3	2	1	1	2	1	2	3	2	1	1	2	3	2	3	5	4	6	5	6	6	6	6	4	6	1	1
212	5	6	6	5	5	5	5	5	6	4	4	5	6	6	4	5	5	6	6	6	5	5	4	5	4	6	5	5	5	5	5	4	5	6	5	4	4	2	1	2	1	3	2	1	1	1	2	6	4
213	5	4	6	4	6	5	5	6	6	6	6	6	4	4	5	5	4	5	6	4	6	6	4	5	6	5	5	6	5	6	5	5	6	4	4	6	4	1	1	2	2	3	2	2	1	3	1	4	5
214	5	5	6	6	4	6	6	4	5	4	6	4	4	6	6	6	5	5	6	5	6	5	4	4	6	5	6	6	6	6	5	4	4	4	5	5	4	1	3	1	2	2	1	2	1	2	2	4	6
215	5	5	5	4	5	4	6	5	6	5	5	4	5	4	5	5	5	6	4	5	5	5	6	4	4	5	5	5	4	6	5	4	6	4	6	4	4	1	1	1	1	2	1	1	1	1	1	6	5
216	5	6	5	5	6	5	5	6	5	4	6	4	5	4	6	6	4	6	4	4	5	6	4	4	5	6	5	5	6	6	4	5	6	5	4	4	5	2	1	2	1	2	2	1	1	3	1	6	5
217	6	5	6	5	6	5	6	6	5	4	5	4	5	5	4	5	6	6	5	4	6	6	5	6	4	6	6	5	5	4	4	6	4	5	4	6	5	1	3	2	2	3	2	2	1	1	2	4	5
218	6	4	5	6	5	6	5	5	6	4	6	6	5	6	5	6	5	5	4	5	6	5	4	6	6	5	4	5	6	5	6	6	5	6	5	5	4	1	2	1	2	2	1	2	2	3	3	5	4
219	6	4	6	4	5	6	5	5	6	6	4	5	6	6	4	6	6	5	6	6	6	5	5	4	5	5	5	6	5	5	5	6	4	5	4	6	5	2	2	2	2	1	1	2	1	2	3	6	6
220	6	4	6	4	4	5	6	6	5	4	5	4	5	6	5	6	5	5	6	4	6	5	6	4	6	5	5	5	4	4	6	4	5	5	5	6	4	2	1	1	1	1	2	2	2	1	1	6	4
221	6	4	5	5	6	6	5	5	6	4	4	4	5	5	5	5	4	5	6	6	6	6	5	4	5	5	6	6	5	4	6	4	5	4	6	5	4	2	3	2	1	1	2	2	2	1	2	6	5
222	5	4	6	5	5	6	6	6	5	4	6	6	5	6	5	6	4	5	4	5	6	6	6	6	6	5	5	6	5	6	5	4	4	5	6	4	5	1	3	2	2	1	2	2	3	1	3	4	5
223	2	1	3	3	1	3	1	3	4	1	3	2	2	3	3	3	3	2	3	1	4	4	1	2	2	4	2	4	3	4	5	4	6	5	5	6	4	3	4	5	4	4	4	5	4	5	6	3	1
224	5	5	5	6	6	5	6	6	6	5	6	5	6	4	6	6	4	5	5	5	6	5	4	4	4	6	5	5	4	6	5	6	4	6	5	4	6	2	3	1	1	3	2	2	1	2	1	4	5
225	4	1	3	3	3	1	4	3	1	3	1	3	3	2	1	4	1	3	1	1	3	3	1	3	3	4	2	2	1	4	4	5	6	4	6	5	4	4	4	4	5	4	4	6	6	4	3	1	2
226	6	4	5	4	4	6	5	6	6	5	6	4	5	6	5	6	6	6	6	5	5	5	6	5	5	5	6	5	5	4	6	5	4	4	5	6	4	2	3	2	1	3	2	1	1	2	2	6	5
227	6	5	6	5	4	6	6	5	5	5	6	4	6	5	6	6	6	6	5	4	6	6	6	5	6	5	4	6	4	5	5	4	5	6	6	6	6	2	2	2	1	1	2	2	1	2	1	5	4
228	4	3	3	1	1	3	4	4	4	3	2	1	2	2	3	3	3	2	3	1	4	1	1	1	3	3	2	4	3	3	3	3	1	1	3	1	2	5	6	5	3	4	6	3	4	5	3	2	2
229	6	5	6	5	5	6	6	6	5	4	5	5	4	6	6	5	4	6	6	5	6	6	4	5	6	5	4	5	4	5	5	6	6	5	6	5	5	2	2	3	1	2	2	1	2	1	3	6	4
230	5	4	6	6	4	5	6	5	5	4	5	5	4	6	6	6	6	6	5	6	5	6	5	4	6	5	4	5	5	4	5	6	5	4	6	4	4	2	3	1	1	3	2	2	2	3	2	6	5
231	3	2	2	1	3	2	4	3	3	1	3	2	3	2	3	1	3	2	3	3	4	3	1	3	1	1	2	4	2	6	4	5	6	6	4	5	6	4	4	5	6	6	3	3	4	4	5	3	2
232	6	4	5	4	5	6	5	5	5	4	6	4	4	4	6	6	5	6	5	4	5	5	6	4	5	5	4	5	5	5	4	6	5	4	5	5	6	1	3	2	1	2	2	1	1	1	3	4	5
233	6	4	6	5	6	5	6	5	6	6	4	6	6	5	5	5	5	6	6	5	6	6	5	4	6	6	5	5	5	2	3	1	2	1	3	2	2	1	1	3	1	1	2	2	1	3	1	6	6
234	3	3	2	3	2	2	2	3	1	3	1	2	3	2	2	3	4	1	3	1	1	2	2	3	2	3	2	4	2	2	3	1	2	1	3	2	2	3	4	5	6	5	6	3	6	4	3	3	2
235	3	2	3	3	1	2	2	2	4	3	3	2	3	3	3	3	2	3	2	1	2	2	1	2	3	3	1	4	2	4	6	4	5	4	6	5	4	3	5	6	4	6	3	5	4	4	4	3	1
236	6	5	5	6	6	4	6	6	5	6	4	5	6	4	4	5	4	6	6	6	6	5	6	6	5	5	4	6	4	4	4	6	6	6	6	5	4	1	1	1	1	1	1	1	1	2	2	4	6
237	1	1	4	1	1	3	2	3	4	2	2	1	2	4	1	2	4	2	1	2	4	2	3	1	3	2	3	3	3	5	6	5	5	5	5	6	4	4	4	4	5	6	3	6	4	6	6	2	2
238	5	5	5	4	5	5	5	6	5	4	4	4	5	5	5	6	6	6	6	6	5	6	6	5	4	5	6	5	4	1	4	2	3	3	2	4	2	2	1	1	2	2	2	2	2	2	1	6	5
239	6	5	5	5	4	6	5	5	5	4	6	4	4	6	6	5	6	6	6	4	5	6	6	4	4	6	6	6	4	5	4	5	6	5	4	4	4	1	3	1	2	3	1	2	1	2	1	6	6
240	5	6	5	4	5	4	5	5	6	5	5	5	5	5	5	6	6	6	6	4	6	6	5	4	6	5	6	5	4	5	5	6	4	5	4	6	5	2	3	3	2	1	2	2	1	1	2	5	5
241	1	3	2	3	2	2	4	1	1	1	3	2	3	4	3	4	4	2	1	2	3	1	1	3	1	2	1	4	3	4	4	4	5	5	5	4	5	5	5	4	3	5	3	5	6	4	6	2	3
242	6	5	6	6	4	5	5	6	5	4	5	4	6	6	6	6	6	6	6	6	5	5	6	6	4	6	6	6	6	2	1	3	2	4	2	4	2	2	3	2	1	3	2	1	3	1	1	5	6
243	5	5	5	5	5	4	6	4	5	5	4	4	4	5	4	6	6	6	6	6	6	6	4	5	5	5	4	5	5	5	6	6	4	5	5	6	5	1	2	2	1	1	2	1	1	2	3	6	5
244	2	1	3	1	2	2	4	1	2	1	1	3	2	1	2	4	3	1	3	1	3	1	1	3	2	4	2	2	1	5	6	4	5	6	5	6	4	5	6	4	3	6	6	3	4	5	6	2	2
245	6	6	5	4	5	6	5	4	6	4	6	4	5	6	6	5	5	6	6	6	6	5	6	4	6	5	5	6	5	5	6	5	5	4	4	6	5	2	2	2	1	2	2	2	2	2	2	6	5
246	2	3	2	2	1	2	4	1	4	1	2	1	3	4	3	1	3	1	1	2	4	1	2	2	1	1	2	1	2	2	1	2	2	3	2	4	2	3	6	4	5	5	6	6	4	6	4	2	1
247	6	5	5	4	6	6	5	6	6	4	4	5	6	6	6	5	4	5	6	4	6	5	6	4	5	5	5	5	4	5	5	6	5	5	5	5	4	2	3	2	1	2	2	2	3	1	1	6	5
248	5	4	6	5	6	5	5	6	6	6	6	4	5	4	4	5	5	6	5	4	5	6	4	5	5	6	6	5	5	4	5	4	5	6	5	6	4	2	3	1	2	3	1	1	3	1	3	6	5
249	5	6	5	4	5	5	5	5	5	4	4	6	5	5	5	6	5	6	5	4	5	5	5	5	4	5	6	5	6	5	5	6	4	6	5	5	4	2	1	2	1	3	2	1	3	2	3	4	5
250	3	1	1	3	3	3	1	3	1	2	3	3	2	2	3	3	1	1	1	1	1	3	1	2	1	3	2	1	3	2	1	2	2	2	2	4	1	5	6	4	5	5	3	4	5	4	4	2	3
251	6	6	5	4	5	6	5	6	5	5	6	4	5	6	6	5	4	5	4	5	5	6	5	4	6	5	5	6	4	5	6	4	4	6	5	6	5	1	2	3	1	3	2	1	3	3	3	6	4
252	6	4	5	6	4	6	5	4	6	4	5	5	6	6	5	5	5	6	6	4	6	6	5	5	6	5	6	6	6	4	5	4	6	5	6	5	5	1	1	2	1	2	2	2	2	3	2	6	6
253	4	1	2	2	1	3	4	2	4	3	1	1	3	1	3	4	4	2	2	2	3	2	1	1	2	4	3	2	2	1	2	3	3	4	3	4	3	4	5	4	4	5	3	4	5	5	3	2	2
254	5	5	6	5	6	4	5	6	6	4	4	6	4	5	6	6	4	6	6	6	5	5	4	4	4	5	4	6	5	5	6	6	5	5	6	6	4	1	2	2	2	2	2	1	1	2	1	5	4
255	6	4	5	5	5	6	6	5	6	6	5	4	4	5	6	5	6	6	6	4	5	6	4	4	5	5	5	6	4	5	6	6	5	5	5	6	4	1	3	2	2	2	2	2	1	2	1	6	6
256	2	1	4	3	2	2	3	3	1	1	1	1	3	2	2	3	1	2	1	2	3	2	1	3	2	3	2	4	2	1	2	1	3	1	2	1	2	5	5	4	4	5	4	6	4	5	3	1	2
257	5	5	5	6	4	5	5	6	5	5	6	6	5	5	4	6	5	6	6	4	6	5	4	5	4	6	6	5	5	6	6	4	4	5	6	5	6	2	3	3	1	3	1	2	1	2	2	6	6
258	5	6	6	4	5	6	5	5	6	4	5	5	5	5	4	6	5	5	5	6	6	5	5	6	5	5	4	5	5	6	4	5	5	6	6	6	5	2	1	2	1	3	2	1	2	2	2	4	4
259	1	2	3	2	1	2	1	3	3	3	2	3	3	4	3	3	3	3	2	2	2	3	2	3	3	1	1	1	3	3	2	1	1	3	2	1	3	3	4	6	3	4	4	6	4	6	6	1	2
260	6	4	5	6	6	4	5	6	6	4	5	4	4	5	4	6	6	5	6	6	5	5	5	5	4	5	4	6	6	5	5	6	5	5	5	6	4	2	3	2	1	3	2	2	3	3	1	6	4
261	5	4	6	6	4	6	6	6	6	6	4	4	6	5	5	6	5	6	5	6	6	5	5	4	4	5	6	5	5	4	4	4	5	5	5	6	4	2	3	2	1	3	1	1	3	3	1	6	5
262	5	5	6	5	5	4	6	6	6	6	5	5	4	5	4	6	4	6	5	4	6	6	5	5	4	5	5	5	4	4	6	6	5	5	5	6	4	2	3	2	2	1	2	2	3	3	1	6	5
263	6	5	5	4	5	4	6	5	6	5	4	6	4	6	4	5	4	5	5	4	6	5	4	6	5	6	4	6	4	5	4	6	6	6	6	6	5	2	3	2	2	1	1	2	2	3	2	5	5
264	5	5	5	4	5	6	6	6	5	4	4	5	5	5	6	5	6	5	4	4	5	5	5	6	5	5	6	6	5	5	5	6	5	6	6	5	6	2	2	2	2	1	1	2	3	2	1	6	5
265	5	5	6	4	6	6	5	5	5	5	6	4	5	4	4	6	6	5	4	5	5	6	6	5	4	5	5	6	5	4	6	6	5	5	5	5	5	1	2	3	1	1	1	2	1	2	2	6	5
266	2	2	4	3	2	3	4	1	3	2	2	1	1	1	2	3	3	1	3	1	4	4	3	1	2	2	1	2	2	2	3	3	2	3	4	1	1	4	6	4	4	5	3	4	6	6	6	3	3
267	6	4	6	6	6	4	6	4	5	6	5	6	4	4	6	6	4	5	5	4	6	5	5	6	6	5	6	5	4	4	6	6	5	5	6	5	4	2	3	1	1	3	2	1	2	1	2	6	4
268	6	5	5	5	5	4	6	5	5	6	6	6	5	4	4	6	5	5	4	4	6	6	4	5	4	5	6	5	5	6	5	6	5	6	6	5	4	1	1	2	1	2	2	1	1	3	1	6	5
269	4	3	1	3	2	2	2	2	3	1	3	1	1	4	1	1	3	3	2	3	4	4	3	1	1	4	2	3	2	3	3	1	2	4	4	1	1	4	4	6	3	6	5	5	6	6	6	1	3
270	6	5	5	5	6	6	5	6	6	4	4	4	5	5	5	5	6	6	6	4	6	6	5	5	4	5	5	6	5	6	6	4	5	6	5	5	6	2	2	3	1	2	1	1	3	1	3	6	5
271	1	1	2	3	2	2	2	1	3	3	3	3	2	2	2	2	1	1	1	3	1	4	1	1	2	3	3	1	1	3	3	2	3	1	4	2	2	5	4	6	4	6	4	6	4	4	6	1	1
272	5	5	5	6	6	4	6	5	6	6	5	5	6	4	4	5	5	5	5	4	5	5	4	4	4	5	4	6	5	4	6	4	6	5	6	5	4	2	1	2	1	1	2	1	1	1	1	5	4
273	6	5	5	4	5	5	6	6	6	4	4	6	6	6	6	5	5	6	4	5	6	6	5	6	5	5	6	5	4	4	5	4	5	6	6	6	5	1	2	2	2	3	2	1	2	2	3	5	5
274	1	2	1	3	1	2	2	3	2	2	3	1	1	3	2	3	1	2	3	2	3	3	1	2	3	3	2	1	2	2	3	1	3	1	4	1	3	4	5	4	6	6	6	4	6	5	4	3	2
275	5	6	5	6	6	6	5	6	5	4	6	5	6	6	5	5	6	5	5	6	6	6	4	4	6	5	5	5	6	4	6	4	4	6	6	5	6	1	2	2	2	3	1	1	3	2	1	4	5
276	5	6	5	5	5	6	6	4	5	4	4	4	5	5	6	5	5	5	6	4	6	6	4	4	6	5	6	6	4	5	5	6	6	6	6	5	6	1	3	2	2	2	2	1	3	1	1	6	6
277	2	1	3	3	3	1	2	1	3	1	3	3	1	2	3	1	2	4	2	2	4	3	1	3	1	3	3	1	2	3	4	1	1	1	3	1	3	3	5	5	6	4	3	6	6	4	6	2	1
278	5	5	6	5	5	4	5	6	5	6	5	5	6	5	5	5	5	5	5	6	5	5	6	5	4	5	4	5	5	5	5	4	5	5	6	6	6	1	1	2	1	2	2	1	1	1	3	5	6
279	6	5	5	4	6	4	5	6	6	4	4	4	5	6	4	6	4	5	6	6	6	5	6	6	6	6	4	6	5	6	6	4	4	6	5	6	5	1	3	2	2	3	1	2	1	1	3	6	4
280	6	5	5	6	6	6	5	6	6	4	5	4	5	6	4	5	6	5	5	4	5	6	6	5	4	5	4	5	5	4	5	5	5	5	6	5	4	1	3	2	1	1	1	1	2	1	3	6	6
281	6	6	5	6	5	4	6	5	5	4	4	5	5	5	5	5	4	6	6	6	5	6	4	5	5	5	6	6	6	6	5	6	5	5	6	5	4	2	3	3	1	3	1	1	1	1	3	5	4
282	5	6	6	4	5	6	5	5	6	4	6	5	4	5	5	5	6	5	4	4	5	6	5	5	5	5	4	6	4	5	6	4	5	6	6	5	4	1	2	2	2	3	2	1	3	3	1	4	4
283	2	2	3	3	3	1	3	1	2	1	1	3	3	2	1	4	2	3	3	3	2	4	2	2	3	2	3	2	1	3	1	1	3	4	1	2	2	6	6	6	4	5	4	6	6	6	5	2	3
284	6	5	6	4	4	6	6	6	5	4	5	6	6	6	6	5	6	5	5	6	5	5	6	5	5	5	6	6	4	4	4	5	5	6	5	5	4	2	3	3	1	1	2	1	1	1	2	5	6
285	3	3	2	1	1	3	1	2	2	3	3	1	3	1	1	2	2	1	1	1	3	3	1	3	1	2	3	1	3	2	2	1	3	1	1	4	2	5	6	6	5	4	6	4	6	4	3	2	1
286	5	5	5	6	6	5	5	6	6	4	5	5	5	6	6	6	6	6	6	5	6	6	6	5	4	5	4	5	6	6	4	4	4	5	5	5	6	2	1	2	1	1	1	2	1	1	3	4	4
287	6	6	5	5	6	6	5	5	6	6	5	4	6	6	4	6	6	5	5	5	5	6	5	4	6	5	5	5	4	5	5	5	4	6	5	5	5	1	3	2	2	2	2	2	3	3	2	6	5
288	5	6	6	4	5	6	6	5	5	6	4	6	5	5	4	5	5	5	5	6	5	6	5	6	5	5	5	5	5	4	5	4	6	5	5	6	5	1	3	1	1	2	2	2	2	2	1	6	6
289	1	2	1	3	1	3	4	4	3	1	2	2	2	3	1	4	3	1	1	1	1	3	3	2	2	1	1	3	2	2	1	3	3	4	3	4	3	6	5	5	4	5	4	3	5	4	5	2	3
290	5	5	6	4	5	6	5	5	5	4	4	5	6	5	4	6	4	5	6	6	6	5	6	4	5	5	6	5	5	6	4	6	6	5	5	6	4	2	3	2	1	3	2	1	3	2	3	4	4
291	6	5	5	5	5	5	5	6	6	6	6	4	5	5	5	5	4	5	5	4	6	6	6	4	4	6	6	5	5	5	5	6	4	5	5	5	5	2	3	2	2	1	1	1	3	2	1	6	5
292	1	3	4	2	2	1	3	3	1	1	3	1	1	4	2	4	3	1	1	1	4	1	3	3	1	4	2	4	1	2	1	3	2	4	1	1	3	6	4	4	3	4	5	5	5	5	4	1	1
293	6	4	5	5	5	5	5	5	6	6	6	4	5	5	6	5	6	6	6	5	6	5	4	6	6	6	6	5	4	6	6	6	5	5	6	6	5	1	3	2	2	1	2	1	3	3	3	5	4
294	1	3	3	3	3	2	1	2	3	1	1	1	3	1	1	4	2	2	3	2	2	3	1	3	1	2	2	4	3	2	1	3	3	2	2	4	1	4	4	4	5	6	6	6	5	6	3	3	2
295	6	5	5	6	4	5	5	4	6	4	6	4	5	5	6	5	6	5	6	5	6	6	5	4	5	6	4	6	5	6	6	6	5	5	5	5	5	1	3	3	2	3	1	2	1	3	1	4	4
296	5	6	6	5	4	6	6	6	6	4	6	4	4	5	6	6	5	6	6	6	6	5	5	4	6	5	4	6	6	5	5	6	4	6	5	6	6	1	1	2	2	1	2	2	3	1	2	6	4
297	5	4	5	6	5	6	6	6	6	4	6	6	6	6	4	5	4	6	6	4	6	5	5	5	6	5	6	5	5	5	5	6	5	6	6	6	4	1	3	3	1	2	2	1	2	2	1	6	5
298	2	1	4	3	3	3	3	4	1	3	2	2	2	2	3	2	3	2	2	2	1	2	2	2	2	2	1	4	3	3	1	1	3	3	1	1	1	4	6	4	5	4	6	6	4	4	6	1	3
299	6	5	6	4	4	5	5	6	6	6	5	5	5	6	6	5	6	6	4	6	5	6	5	4	5	5	6	6	4	5	4	5	6	5	5	5	6	2	3	1	1	1	2	2	2	1	1	5	5
300	6	5	5	4	6	5	6	6	6	4	4	4	5	6	5	5	6	5	5	4	5	6	5	6	6	6	4	5	4	5	5	5	5	6	6	5	5	1	2	1	2	3	2	2	2	2	1	6	5
301	1	1	3	1	1	3	1	1	4	3	1	2	3	3	3	3	2	4	1	2	1	4	3	3	1	2	1	2	1	2	4	3	3	1	2	1	2	6	6	6	4	4	5	5	4	5	3	2	2
302	5	5	6	5	4	6	5	6	5	5	4	5	6	5	6	5	4	5	6	6	6	6	4	4	5	5	5	6	6	4	6	6	4	6	6	6	6	2	2	3	2	3	2	2	2	2	2	6	5
303	6	6	5	6	6	6	6	6	6	5	4	4	4	6	4	5	4	5	6	5	5	5	6	4	4	5	4	5	4	4	5	5	5	6	6	5	4	2	2	2	1	1	2	1	1	1	1	4	5
304	5	5	5	4	5	4	5	5	5	6	4	4	5	5	6	6	5	5	5	4	5	5	5	5	4	6	4	6	6	6	6	6	5	5	5	6	4	2	2	2	1	2	2	2	2	2	2	6	5
305	1	1	4	3	3	1	2	3	2	3	1	3	2	4	1	4	4	2	3	2	1	2	2	2	2	1	3	4	2	1	2	1	2	3	2	2	3	5	5	6	3	6	3	4	5	5	3	1	3
306	6	6	6	5	5	5	6	6	6	4	4	4	6	6	4	5	5	6	4	5	5	5	5	4	6	5	4	6	5	4	5	5	6	5	5	6	5	2	3	1	2	1	2	2	1	3	1	4	5
307	4	2	3	3	3	1	3	2	4	2	1	2	1	2	2	4	1	3	1	3	3	1	2	3	1	2	2	1	3	3	1	1	2	2	4	2	3	6	5	4	6	6	3	6	5	5	5	2	3
308	5	4	6	5	6	6	5	6	5	4	4	6	6	5	5	6	6	6	4	6	6	5	5	6	6	5	4	5	5	5	4	6	5	5	5	6	6	2	2	3	1	3	2	2	1	1	2	6	6
309	5	5	5	6	4	4	6	6	6	6	4	4	4	5	6	5	4	6	4	4	6	5	4	5	4	5	4	6	5	6	6	6	4	5	6	6	4	1	1	3	1	3	1	2	3	2	1	5	4
310	4	2	4	1	1	1	2	3	4	2	2	3	3	1	1	4	1	2	3	2	3	4	3	2	3	3	3	1	3	3	2	1	1	4	2	3	2	3	6	5	6	4	4	5	5	5	4	2	2
311	5	5	5	4	6	5	5	4	6	4	6	4	5	6	6	6	5	6	5	5	5	5	6	4	5	6	6	6	5	5	5	4	4	6	6	5	4	2	2	3	1	3	2	2	1	1	1	5	4
312	6	6	6	6	4	4	5	4	6	5	4	6	4	5	4	5	6	6	4	6	6	6	6	5	5	5	6	6	5	4	6	6	6	6	5	5	6	2	1	3	1	3	2	2	1	1	2	4	4
313	1	2	2	3	3	1	1	1	3	2	2	2	1	1	3	3	2	3	3	3	2	1	1	1	1	1	3	2	3	1	4	1	3	1	2	4	1	5	6	5	4	4	4	3	5	6	3	2	3
314	6	5	5	4	6	6	5	5	5	4	6	4	5	5	6	5	4	5	5	4	6	5	5	5	4	5	4	5	6	5	5	6	6	5	6	6	4	2	1	1	1	2	2	2	1	3	2	6	4
315	5	6	5	5	6	6	6	5	6	4	5	5	4	5	6	5	5	5	4	4	6	6	6	4	4	6	4	5	4	5	4	4	4	5	5	6	5	2	2	2	2	2	2	2	2	3	2	5	5
316	5	4	5	5	5	6	5	6	5	4	6	6	6	4	4	5	4	6	6	5	5	5	4	4	6	5	4	5	5	6	4	5	5	5	5	5	6	1	3	2	2	3	2	2	1	2	2	4	6
317	6	4	6	6	5	6	5	5	6	4	5	4	4	5	5	6	5	6	6	4	6	6	4	6	6	6	6	5	5	5	4	5	4	5	5	6	4	1	1	2	1	2	2	2	2	1	2	5	5
318	5	5	5	4	5	6	5	5	5	5	4	4	4	6	6	5	6	6	6	6	6	5	5	6	4	5	6	6	5	6	6	4	5	6	6	6	4	2	1	2	2	2	2	2	1	2	1	4	6
319	6	5	5	4	6	5	6	5	6	4	4	6	5	4	4	5	6	6	6	6	5	6	4	4	5	5	6	6	6	4	5	4	6	6	5	5	4	1	1	1	1	3	2	1	3	2	1	5	5
320	5	5	5	6	6	6	5	5	5	4	4	4	6	6	5	5	5	6	6	4	5	5	4	5	5	6	4	5	4	4	4	5	5	6	5	5	6	1	3	3	2	1	2	2	1	1	1	4	5
321	1	3	2	2	3	2	3	2	1	1	1	2	2	4	2	2	3	4	1	3	3	3	2	2	3	3	2	2	2	3	3	3	2	2	3	1	2	4	5	5	6	4	4	6	5	6	4	3	3
322	5	4	5	6	4	5	5	4	5	5	6	6	5	5	4	6	6	5	5	4	5	5	6	4	4	5	5	6	5	4	4	5	5	6	5	5	4	1	1	2	2	2	2	2	1	2	1	5	5
323	5	5	6	6	4	6	5	4	5	6	6	4	6	6	4	5	6	6	6	5	5	5	6	5	6	6	5	6	5	5	4	6	5	6	6	5	4	1	2	2	1	3	2	2	2	2	2	4	4
324	3	2	4	2	3	3	3	3	1	3	3	2	3	3	2	3	4	2	2	3	3	2	2	3	3	2	2	4	3	3	2	1	3	2	2	4	2	5	4	6	5	5	6	5	5	6	5	3	3
325	6	6	5	4	5	4	6	5	6	5	5	4	6	5	4	6	6	6	6	4	6	5	4	4	4	6	5	6	5	4	4	4	5	6	5	5	6	2	1	2	2	1	1	1	1	2	2	5	5
326	5	6	5	5	4	6	5	6	6	5	6	5	5	6	4	5	4	6	6	6	5	5	5	5	4	5	5	6	5	5	5	6	4	5	6	6	4	2	3	3	2	1	1	1	1	2	3	5	5
327	5	4	5	5	6	6	5	4	6	4	5	4	4	6	6	6	5	6	4	4	5	5	4	4	5	5	5	6	6	4	5	5	6	6	5	6	4	1	2	3	1	3	2	2	1	1	1	6	6
328	6	4	5	6	5	4	5	5	5	5	6	5	4	6	6	5	5	6	6	5	5	6	5	4	5	5	6	6	4	4	4	6	6	5	6	6	5	2	1	2	1	2	1	1	2	2	1	6	6
329	1	3	4	1	3	3	1	2	4	3	3	3	3	3	2	2	1	3	2	2	1	3	3	2	2	4	3	4	3	1	4	3	3	4	3	2	3	5	6	6	5	6	4	3	5	5	4	3	1
330	5	6	5	5	6	4	6	6	6	6	6	4	6	5	5	5	6	5	5	5	6	5	6	5	5	6	6	5	5	4	5	6	6	6	5	5	6	2	1	3	1	3	2	1	3	3	2	4	4
331	1	1	4	3	1	1	2	2	4	2	1	2	3	3	3	3	3	1	3	2	4	4	2	3	1	2	3	2	3	3	4	1	3	1	4	1	3	5	5	4	6	6	3	5	5	4	4	2	1
332	5	5	6	6	5	5	5	6	6	5	4	4	4	6	5	5	6	6	6	5	6	5	6	4	5	5	4	5	5	5	5	6	5	5	5	6	4	2	1	2	2	1	2	1	2	1	2	6	5
333	6	4	6	4	4	5	6	6	5	5	4	4	6	4	4	6	6	5	4	4	5	5	4	4	4	5	5	6	5	4	6	5	4	5	5	5	4	1	2	3	1	1	2	1	1	3	1	6	5
334	6	4	5	6	5	5	6	5	5	5	6	4	5	6	6	6	6	5	4	6	6	5	4	4	5	5	6	6	5	6	5	6	4	6	6	6	5	1	1	2	1	2	1	1	2	1	2	6	6
335	5	6	5	6	6	6	6	6	6	4	6	4	4	5	6	6	5	6	4	4	5	6	5	4	4	5	6	6	4	6	5	6	5	6	5	5	4	2	2	1	1	3	2	2	3	3	2	6	5
336	2	3	3	3	1	3	4	3	2	3	1	1	2	4	3	4	2	2	1	1	1	1	3	1	1	2	2	3	2	1	3	2	2	4	1	2	2	3	4	6	5	5	4	3	5	4	3	3	2
337	6	5	6	5	4	5	5	5	5	5	6	4	6	4	5	6	5	6	4	5	6	6	5	6	5	5	6	6	6	6	5	6	5	5	5	6	4	2	1	2	2	2	1	1	1	3	2	4	6
338	6	5	5	5	4	4	6	5	6	4	4	6	4	4	5	5	4	5	4	5	5	5	6	5	4	6	4	5	4	5	5	4	4	5	5	5	5	2	2	2	2	1	2	2	3	1	1	6	5
339	5	5	5	5	6	6	6	6	5	4	6	6	4	6	4	5	5	5	4	5	6	5	6	4	5	5	5	6	6	5	5	5	5	5	5	5	4	1	3	3	2	2	2	2	3	1	1	5	5
340	6	5	5	4	4	5	6	5	6	5	5	4	5	6	5	5	5	5	4	5	5	5	6	5	6	6	6	6	6	5	4	6	4	6	6	6	5	1	2	3	1	3	2	1	1	1	2	6	4
341	2	1	3	1	3	3	3	3	2	1	1	3	1	3	1	1	3	1	1	1	3	3	3	1	1	2	3	4	3	1	2	1	1	2	1	3	1	4	6	5	3	6	6	4	5	5	3	1	2
342	5	4	5	5	5	6	5	6	5	4	6	5	6	4	6	5	5	6	5	4	5	5	5	6	5	5	4	6	6	4	5	6	5	6	6	5	5	1	2	2	2	2	2	1	1	1	2	6	5
343	6	4	6	6	6	6	5	6	6	4	6	4	5	5	6	5	6	6	6	5	6	6	5	6	5	5	4	5	6	5	5	5	5	6	6	5	4	1	1	1	1	2	2	1	1	3	1	6	5
344	6	5	6	6	4	4	5	5	6	4	4	6	4	6	5	6	4	6	6	5	5	5	4	4	4	5	4	6	4	5	4	6	4	6	5	5	6	2	3	2	1	1	2	2	2	3	3	5	5
345	6	6	5	6	6	5	6	4	6	6	5	5	5	5	6	6	5	6	4	6	6	5	6	4	4	6	6	5	5	5	5	5	4	6	5	6	5	1	1	2	1	3	1	1	1	3	2	4	6
346	6	4	6	5	5	5	5	6	5	6	5	4	5	6	6	6	5	5	6	4	6	6	6	5	5	6	4	5	6	4	5	5	4	5	5	5	6	2	2	2	2	3	2	1	1	1	3	6	4
347	6	5	5	4	4	4	5	6	6	4	6	5	5	6	4	6	4	5	6	6	5	6	6	6	4	6	4	6	6	4	5	6	5	6	5	6	4	2	1	2	1	1	2	1	3	3	1	4	5
348	6	4	6	5	6	5	6	5	5	6	6	4	5	6	5	5	5	5	6	4	6	6	5	5	4	6	4	5	4	6	6	6	6	6	5	6	4	1	3	2	2	1	2	1	2	3	1	4	6
349	4	3	4	2	3	1	2	4	1	2	2	1	3	3	2	3	4	4	1	1	1	4	2	1	2	4	2	2	2	1	2	3	1	4	3	3	3	3	5	6	4	6	6	4	4	6	6	1	2
350	6	5	5	6	5	4	6	5	6	4	6	5	4	4	6	5	4	5	6	4	5	6	5	6	5	5	5	6	5	4	6	5	4	5	5	5	6	1	3	2	1	3	1	1	1	3	1	6	5
351	2	3	3	3	1	3	3	3	3	1	2	2	2	4	2	1	1	1	1	3	3	2	3	1	2	2	3	4	2	3	3	2	2	4	4	1	1	5	6	5	6	5	3	4	6	6	6	2	1
352	6	5	5	5	5	5	6	5	6	4	4	4	4	6	4	6	5	6	6	4	6	5	5	5	6	5	4	5	4	6	6	5	5	6	6	5	5	2	1	3	2	1	2	1	1	1	2	4	4
353	5	5	6	6	6	5	6	5	6	4	4	6	4	6	6	5	5	6	6	6	5	6	4	6	6	5	6	6	6	4	6	5	6	5	6	6	4	2	3	2	2	1	2	1	2	1	1	6	4
354	1	2	3	1	2	2	3	2	1	3	3	1	1	3	2	1	3	1	1	1	2	1	1	3	2	4	2	3	1	3	1	2	3	4	2	4	3	4	6	4	5	4	5	3	6	6	4	2	3
355	1	1	4	1	2	1	2	3	2	2	1	1	1	3	1	1	2	4	2	2	3	1	2	3	2	3	2	2	3	2	4	1	1	2	4	3	1	5	6	5	6	5	5	6	6	4	3	1	3
356	4	2	3	2	1	2	3	2	3	3	1	1	1	4	3	4	4	3	1	1	3	2	1	2	2	3	1	4	2	1	2	3	1	1	4	1	2	4	6	6	6	5	3	5	4	5	5	2	2
357	6	6	5	6	5	5	6	6	5	5	5	5	6	5	5	6	6	5	6	5	5	5	4	5	5	6	5	6	5	6	4	4	4	5	5	6	6	2	1	2	2	3	2	2	3	1	1	4	4
358	2	1	3	1	1	2	4	1	1	1	1	1	1	4	3	3	1	4	2	3	2	2	3	1	1	4	3	3	3	3	4	3	1	1	2	4	3	3	4	4	6	6	5	4	5	4	5	1	1
359	5	6	6	5	4	6	6	5	5	4	4	5	6	5	5	6	6	5	6	5	5	5	5	5	5	6	4	5	4	4	5	5	5	5	5	6	4	2	2	1	2	2	1	2	2	1	2	5	5
360	6	5	5	5	5	6	6	4	5	4	5	4	6	6	6	6	4	5	4	5	5	6	5	6	6	5	6	5	4	5	6	5	5	6	6	5	5	1	3	3	2	1	1	2	1	3	1	4	5
361	6	6	5	6	4	5	5	4	6	4	6	4	4	4	6	6	5	5	4	6	6	6	4	4	4	5	5	5	4	4	5	4	5	5	5	6	4	1	2	1	2	2	2	1	2	3	3	6	5
362	5	6	6	5	5	6	6	6	5	5	4	5	5	5	6	6	4	6	5	4	6	6	6	5	6	5	4	5	6	5	5	5	6	5	5	5	6	2	2	2	2	3	1	2	3	2	1	4	5
363	6	6	5	5	4	4	5	6	6	6	6	4	5	5	6	5	6	5	5	4	6	5	6	4	5	6	6	5	4	6	4	4	6	6	5	5	4	1	2	2	1	3	2	1	3	3	1	6	4
364	5	4	5	6	4	5	5	5	6	6	4	5	4	5	5	6	5	6	4	4	5	6	5	4	4	5	5	6	5	5	4	5	5	5	5	5	6	2	1	2	2	2	1	2	3	1	3	4	5
365	5	5	6	6	6	6	6	4	6	4	6	4	5	5	5	5	4	5	6	5	5	6	6	4	6	6	4	6	5	4	5	6	4	5	5	5	5	2	3	3	1	3	1	1	2	3	1	5	5
366	5	5	5	6	6	6	5	6	6	4	4	5	6	5	4	5	5	6	4	6	5	5	6	4	5	5	5	5	5	5	6	6	6	5	5	5	4	2	3	2	2	2	2	2	1	3	2	5	5
[truncated: 58 more columns]
